# Supplementary material for: Improving CoQ10 Productivity by Strengthening Glucose Transmembrane of Rhodobacter Sphaeroides
Source: Research Square preprint supplement (doi:10.21203/rs.3.rs-895662/v1), 2021-09-21
Supplement: Supplementary file 1 [file f71e85b9c8f37fae06c25961.docx]

**Table S3** Primers used for mutant strains verification

| Name | Sequence 5’→3’ |
| --- | --- |
| *glk*-P1 | TCGCCGATTATGCCGAGGTA |
| *glk* -P4 | ACGCTGCTGCCCTCGATGAA |
| *fruA*-P1 | TGTTCCGACGCCGAAGCCGT |
| *fruA*-P4 | CCGCTCCACTCGTGTCGTTC |
| *fruB*-P1 | GCAACATCGGTCCCGCACTC |
| *fruB* -P4 | GGCGCATCTTCCAGCACCTC |
| Over-expression P1 | ACAATTTCCATTCGCCATTC |
| Over-expression P2 | CGTAAATCACTGCATAATTC |
